# Supplementary material for: Analysis of parahydrogen polarized spin system in low magnetic fields
Source: Royal Society of Chemistry journal article supplement (doi:10.1039/c4cp01807a), 2014-01-01
Supplement: c4cp01807a1.pdf [file c4cp01807a1.pdf]

## Analysis of parahydrogen polarized spin systems in low magnetic fields

### Supplementary Information

Pierre Türschmann<sup>1,2</sup>, Johannes Colell<sup>1</sup>, Thomas Theis<sup>3</sup>, Bernhard Blümich<sup>1</sup> and Stephan Appelt<sup>1,4</sup>

<sup>1</sup>*Institut für Technische Chemie und Makromolekulare Chemie, RWTH Aachen University,  
D-52056 Aachen, Germany.*

<sup>2</sup>*Max Planck Institute for the Science of Light, D-91058 Erlangen, Germany.*

<sup>3</sup>*Department of Chemistry, Duke University, Durham, NC 27708 USA.*

<sup>4</sup>*Zentralinstitut für Engineering, Elektronik und Analytik, Systeme der Elektronik (ZEA-2), Forschungszentrum  
Jülich, D-52425 Jülich, Germany.*

### Appendix A: Derivation of the three-spin density matrix

The Liouville-von-Neumann equation describes the temporal evolution of the spin state characterized by the time dependent density matrix  $\rho_{I_1 I_2 S}(t)$  under the influence of the Hamiltonian  $\mathcal{H}^{I_1 I_2 S}$ . The time dependent density matrix  $\rho_{I_1 I_2 S}(t)$  contains all spin operators which can be generated by  $\mathcal{H}^{I_1 I_2 S}$  acting on the initial singlet state  $\rho_p$ . If non-detectable spin states are neglected the resulting system consists of six coupled linear differential equations characterized by the coefficients  $a(t)$ ,  $b(t)$ , ...  $f(t)$ . The general time dependent form is

$$\begin{aligned}\rho_{I_1 I_2 S}(t) = & I_{1z} I_{2z} + a(t) \cdot ZQ_x + 2 \cdot b(t) \cdot ZQ_y S_z + c(t) \cdot (I_{1z} - I_{2z}) S_z \\ & + 2 \cdot d(t) \cdot ZQ_x S_z + e(t) \cdot ZQ_y + \frac{1}{2} f(t) (I_{1z} - I_{2z}).\end{aligned}$$

Introducing  $\Delta J = J_{1S} - J_{2S}$  and  $\Delta\omega = \omega_1 - \omega_2$  the system of six linear, coupled differentials becomes

$$\begin{aligned}\frac{\partial a(t)}{\partial t} &= \pi \Delta J b(t) + \Delta\omega e(t) \\ \frac{\partial b(t)}{\partial t} &= 2\pi J_{12} c(t) - \pi \Delta J a(t) - \Delta\omega d(t) \\ \frac{\partial c(t)}{\partial t} &= -2\pi J_{12} b(t) \\ \frac{\partial d(t)}{\partial t} &= \pi \Delta J e(t) + \Delta\omega b(t) \\ \frac{\partial e(t)}{\partial t} &= 2\pi J_{12} f(t) - \pi \Delta J d(t) - \Delta\omega a(t) \\ \frac{\partial f(t)}{\partial t} &= -2\pi J_{12} e(t).\end{aligned}$$

The boundary condition is that the initial state of the system  $\rho_{I_1 I_2 S}(t=0)$  has to correspond to the singlet state  $\rho_p$  of parahydrogen. Solving these equations one obtains the general form of  $\rho_{I_1 I_2 S}(t)$ . The symmetry breaking process of the initial singlet state occurs continuously over a time period  $\tau$ . The coefficients are oscillating with frequencies  $2\pi J_{12} \sqrt{1+x_+^2}$  and  $2\pi J_{12} \sqrt{1+x_-^2}$  where  $x_- = y - x$  and  $x_+ = y + x$ .

The steady state solution of the density matrix  $\overline{\rho_{I_1 I_2 S}}$  is obtained by the time averaged coefficients  $\bar{a} \dots \bar{f}$ . If we assume that  $\tau^{-1} \ll 2\pi J_{12} \sqrt{1+x_+^2}$ ,  $\bar{b}$  and  $\bar{e}$  will be equal to zero. The limiting cases

$$\begin{aligned}\lim_{\Delta\omega_{12} \rightarrow 0} \overline{\rho_{I_1 I_2 S}} &= I_{1z} I_{2z} + \frac{1}{1+y^2} ZQ_x + \frac{y}{1+y^2} (I_{1z} - I_{2z}) S_z \\ \lim_{\Delta J \rightarrow 0} \overline{\rho_{I_1 I_2 S}} &= I_{1z} I_{2z} + \frac{1}{1+x^2} ZQ_x + \frac{x}{2(1+x^2)} (I_{1z} - I_{2z})\end{aligned}$$

agree with the known forms in case there is either no chemical shift difference between nuclei  $I_1$   $I_2$  or no heteronuclear  $J$ -coupling term.

## Appendix B: Energy Eigenvalues, transition frequencies and bandwidth

Introducing  $v_0^* = v_0(1 + (\delta_1 + \delta_2)/2)$  the energy eigenvalues of the two-spin system Hamiltonian  $\mathcal{H}_{I_1 I_2}$  are given by

$$\begin{aligned} E_1 &= h \left( -v_0^* + \frac{J}{4} \right) \\ E_2 &= h \left( -\frac{1}{2} \sqrt{J^2 + (\delta v)^2} - \frac{J}{4} \right) \\ E_3 &= h \left( \frac{1}{2} \sqrt{J^2 + (\delta v)^2} - \frac{J}{4} \right) \\ E_4 &= h \left( v_0^* + \frac{J}{4} \right). \end{aligned}$$

Note that the frequency difference  $E_4 - E_1 = h \Delta \nu_D$  defines the spectral width of the spectrum and therefore the minimum bandwidth of the amplifier. This is used for the analytical description of the *SNR*.

The four corresponding eigenstates can be expressed in the Zeeman basis set ( $|\alpha\alpha\rangle, |\alpha\beta\rangle, |\beta\alpha\rangle, |\beta\beta\rangle$ ) using the mixing angle  $\phi = \frac{1}{2} \arctan(x^{-1})$ .

$$\begin{aligned} \varphi_1 &= (0, 0, 0, 1) \\ \varphi_2 &= (0, \cos \phi, -\sin \phi, 0) \\ \varphi_3 &= (0, \sin \phi, \cos \phi, 0) \\ \varphi_4 &= (1, 0, 0, 0) \end{aligned}$$

The transition frequencies between the eigenstates can be expressed in a Taylor series as a function of  $x$  assuming the inverse weak coupling limit ( $\delta v < J$ ). Truncation after the 4<sup>th</sup> order yields

$$\begin{aligned} v_1 &= \frac{E_2 - E_1}{h} \approx v_0^* - J \left( 1 + \frac{1}{4} x^2 - \frac{1}{16} x^4 \right) \\ v_2 &= \frac{E_4 - E_3}{h} \approx v_0^* - \frac{1}{4} x^2 + \frac{1}{16} x^4 \\ v_3 &= \frac{E_3 - E_1}{h} \approx v_0^* + \frac{1}{4} x^2 - \frac{1}{16} x^4 \\ v_4 &= \frac{E_4 - E_2}{h} \approx v_0^* + J \left( 1 + \frac{1}{4} x^2 - \frac{1}{16} x^4 \right). \end{aligned}$$

These equations define the non-linear splitting.

## Appendix C: Line Amplitudes for thermal and parahydrogen induced polarization

If a two-spin system is subjected to a  $\pi/2$   $x$ -pulse spin components will be aligned to the  $y$ -axis of a coordinate frame rotating at the Larmor frequency. The observable magnetization is given by

$$\langle I_{1y} + I_{2y} \rangle = \text{Tr} \left[ (I_{1y} + I_{2y}) \cdot e^{-\frac{i}{\hbar} \mathcal{H}^{I_1 I_2} t} \cdot \rho_{init} \cdot e^{\frac{i}{\hbar} \mathcal{H}^{I_1 I_2} t} \right].$$

$\rho_{init}$  defines the type of polarization which is either a thermally or a parahydrogen polarized spin state. For convenience a unitary transformation can be performed to change into the eigenbasis of the Hamiltonian  $\mathcal{H}^{I_1 I_2}$ . The unitary matrix  $U$  is composed of the four orthonormal eigenvectors in the Zeeman basis

$$U = \begin{pmatrix} 1 & 0 & 0 & 0 \\ 0 & \cos \phi & -\sin \phi & 0 \\ 0 & \sin \phi & \cos \phi & 0 \\ 0 & 0 & 0 & 1 \end{pmatrix}.$$

The corresponding expression for the Hamiltonian describing the time evolution consists of the diagonal matrix  $\lambda = \text{diag}\{E_1, E_2, E_3, E_4\}$  including the eigenvalues of  $\mathcal{H}^{I_1 I_2}$ .

$$e^{\frac{i}{\hbar}\lambda t} = U^{-1} \cdot e^{\frac{i}{\hbar}\mathcal{H}^{I_1 I_2} t} \cdot U$$

If the sample is thermally prepolarized the initial density matrix  $\rho_{init}^{Boltz}$  in the high temperature approximation after a  $\pi/2$   $x$ -pulse is

$$\rho_{init}^{Boltz} = \beta(I_{1y} + I_{2y}).$$

With  $\beta$  as defined by Eq. (4). Using these expressions and assuming  $\beta = 1$  the characteristic amplitudes  $A_i^{Boltz}$  of transitions for thermally polarized systems become

$$\begin{aligned} A_1^{Boltz} &= A_4^{Boltz} = \frac{1}{4} - \frac{1}{4\sqrt{1+x^2}} \\ A_2^{Boltz} &= A_3^{Boltz} = \frac{1}{4} + \frac{1}{4\sqrt{1+x^2}}. \end{aligned}$$

For PHIP with  $\pi/2$  and  $\pi/4$  excitation pulses the amplitudes are given by

$$\begin{aligned} A_1^{\frac{\pi}{2}PHIP} &= A_2^{\frac{\pi}{2}PHIP} = -A_3^{\frac{\pi}{2}PHIP} = -A_4^{\frac{\pi}{2}PHIP} = \frac{x^2}{4(1+x^2)^{3/2}} \\ A_1^{\frac{\pi}{4}PHIP} &= -A_4^{\frac{\pi}{4}PHIP} = \frac{x^2(-1-\sqrt{2}+\sqrt{1+x^2})}{8(1+x^2)^{3/2}} \\ A_2^{\frac{\pi}{4}PHIP} &= -A_3^{\frac{\pi}{4}PHIP} = \frac{x^2(1+\sqrt{2}+\sqrt{1+x^2})}{8(1+x^2)^{3/2}}. \end{aligned}$$

These expressions define the sum  $\sum_i |A_i|$  in Eq. (20). The amplitudes are the analytic description of line amplitudes expected in PHIP spectra which are shown in Fig. 2b. Irrespective of the applied excitation pulse the transition lines  $v_2$  and  $v_3$  have an opposite sign of and the same magnitude of amplitudes. This explains the boundaries of the integral  $\mathcal{S}_{v_{23}}$  in Eq. (18), as for reasons of symmetry only the part of a Lorentz shaped peak which overlaps with the other peak of opposite sign leads to area cancelation.

#### Appendix D: Signal to Noise model

For a coil detected NMR signal with a constant polarization  $P_n$  the SNR limited by the Johnson noise ( $\sqrt{4kTR_s \Delta v_D}$ ) using the detection bandwidth  $\Delta v_D = J_{12} (1 + \sqrt{1+x^2})$  (see appendix A) can be defined as

$$SNR = \alpha \frac{B_0 \cdot P_n}{\sqrt{4kTR_s \Delta v_D}} \sum_i |A_i|.$$

For the two-spin system investigated in this article we require at least  $\Delta v_D \geq v_4 - v_1$ . From appendix C we get

$$\begin{aligned} \sum_{i=1}^4 \left| A_i^{\frac{\pi}{2}PHIP} \right| &= \frac{x^2}{(1+x^2)^{3/2}} \\ \sum_{i=1}^4 \left| A_i^{\frac{\pi}{4}PHIP} \right| &= \frac{x^2}{4(1+x^2)} \text{ for } x > \sqrt{2(1+\sqrt{2})} \\ &= \frac{(1+\sqrt{2})x^2}{4(1+x^2)^{3/2}} \text{ for } x < \sqrt{2(1+\sqrt{2})}. \end{aligned}$$
